# Supplementary material for: Implementing Montessori Methods for Dementia: A Scoping Review
Source: Oxford University Press journal article supplement (doi:10.1093/geront/gnw147), 2017-01-06
Supplement: gnw147_suppl_Appendix_A.docx [file gnw147_suppl_Appendix_A.docx]

**Appendix A.**

Search Strategy for PsycINFO

1. exp dementia/
2. alzheimer's disease/
3. alzheimer*.tw.
4. 1 or 2 or 3
5. exp montessori method/
6. montessori.tw.
7. 5 or 6
8. 4 and 7
